# Supplementary material
Source: MDPI journal article supplement (https://www.mdpi.com/1424-8247/15/1/8)
Supplement: s1 [file s1]

# Repositioning of Etravirine as a potential CK1 $\epsilon$ inhibitor by virtual screening

Luis Córdova-Bahena, Axel A. Sánchez-Álvarez, Angel J. Ruiz-Moreno, and Marco A. Velasco-Velázquez

## Supplementary material

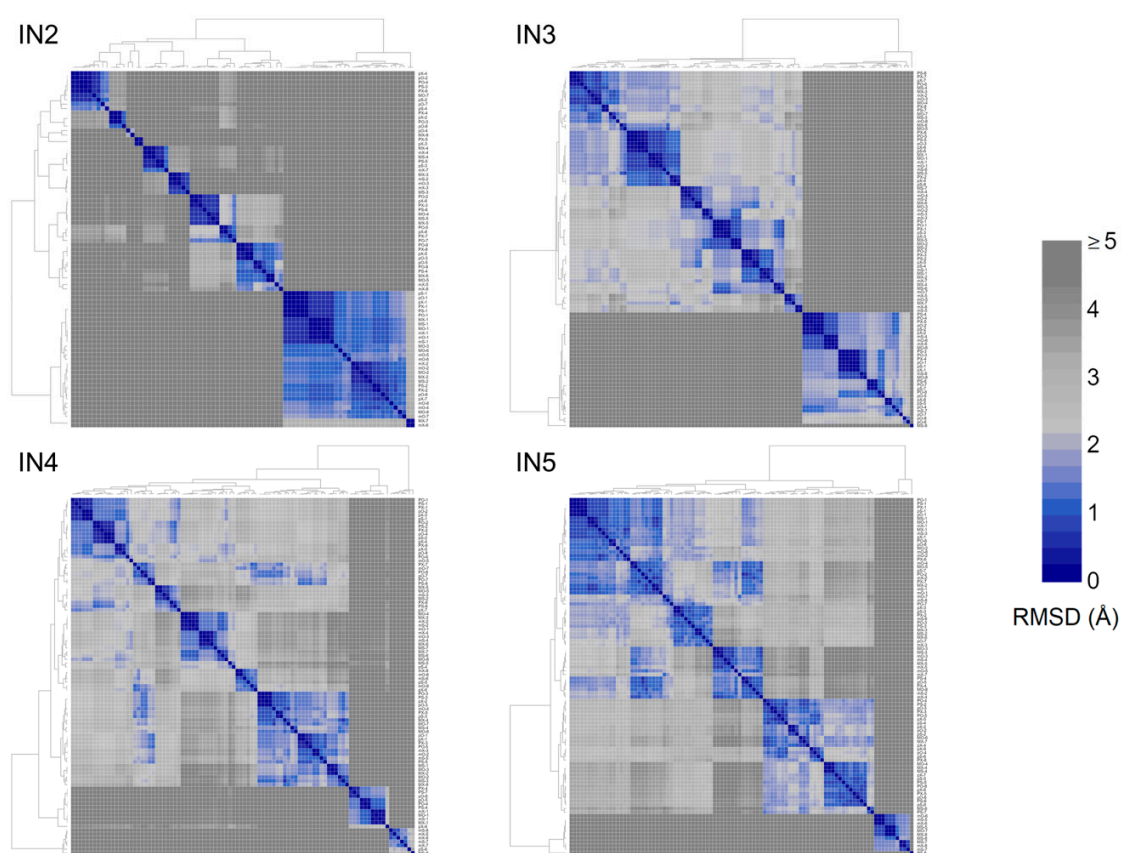

**Figure S1. Docking protocol for selected inhibitors set.** Hierarchical clustering of poses obtained by molecular docking. Color scale shows the RMSD between poses.

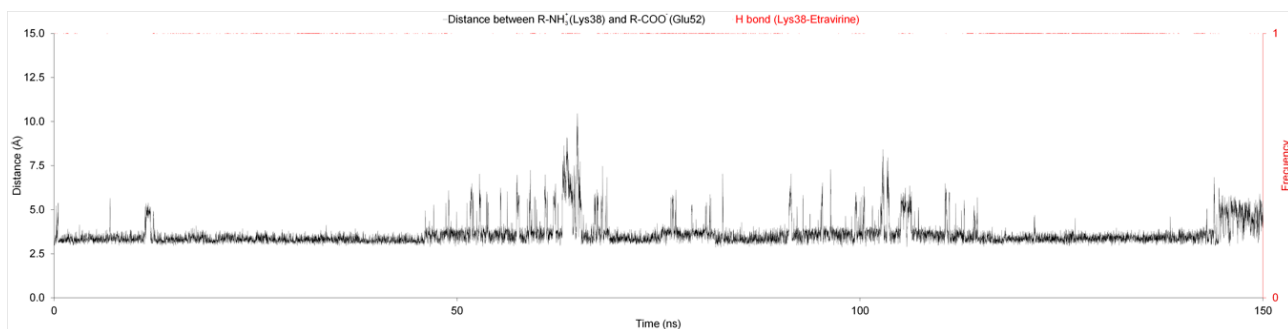

**Figure S2. Salt bridge between Lys38 and Glu52 in CK1ε-Etravirine.** Distance between the ammonium group of Lys38 and the carboxylate group of Glu52 on black line. Presence of hydrogen bond between Etravirine nitrile moiety and Glu52 during 150 ns MD indicated as red dots.

**Table S1. Hits from virtual screening.**

| Drug name    | Structure | Pharmacophore matching | Interest predominant specie at physiological pH | Binding mode in agreement with pharmacophore | Further studied |
|--------------|-----------|------------------------|-------------------------------------------------|----------------------------------------------|-----------------|
| Eravacycline |           | ✓                      | ✗                                               | N.D.                                         | ✗               |
| Omadacycline |           | ✓                      | ✗                                               | N.D.                                         | ✗               |
| Sarecycline  |           | ✓                      | ✗                                               | N.D.                                         | ✗               |
| Flupirtine   |           | ✓                      | ✗                                               | N.D.                                         | ✗               |
| Dolutegravir |           | ✓                      | ✓                                               | ✗                                            | ✗               |
| Fostamatinib |           | ✓                      | ✓                                               | ✗                                            | ✗               |
| Etravirine   |           | ✓                      | ✓                                               | ✓                                            | ✓               |
| Abacavir     |           | ✓                      | ✓                                               | ✓                                            | ✓               |

N.D.: not determined
